# Supplementary material for: A regulation strategy of self-assembly molecules for achieving efficient inverted perovskite solar cells
Source: Royal Society of Chemistry journal article supplement (doi:10.1039/d4cp00509k), 2024-01-01
Supplement: d4cp00509k1.pdf [file d4cp00509k1.pdf]

## Electronic Supplementary Information

### **A regulation strategy of self-assembly molecules for achieving efficient inverted perovskite solar cells**

Pu-An Lin<sup>a, b, c</sup>, Bo Yang<sup>a, b</sup>, Changqing Lin<sup>d</sup>, Zhenghui Fan<sup>a, b</sup>, Yu Chen<sup>e</sup>, Wenfeng Zhang<sup>f</sup>, Bing Cai<sup>c\*</sup>, Jie Sun<sup>a\*</sup>, Xiaojia Zheng<sup>a, b</sup>, Wen-Hua Zhang<sup>c\*</sup>

<sup>a</sup> Institute of Chemical Materials, China Academy of Engineering Physics, Mianyang 621900, China.

<sup>b</sup> National Energy Novel Materials Center, Chengdu 610200, China.

<sup>c</sup> Yunnan Key Laboratory of Carbon Neutrality and Green Low-carbon Technologies, School of Materials and Energy, Yunnan University, Kunming, Yunnan 650000, China.

<sup>d</sup> School of Physical Science and Technology, Guangxi University, Nanning 530004, China.

<sup>e</sup> College of Materials and Chemistry & Chemical Engineering, Chengdu University of Technology, Chengdu, 610059 P. R. China.

<sup>f</sup> Institute of Photovoltaic, Southwest Petroleum University, Chengdu, 610500, China.

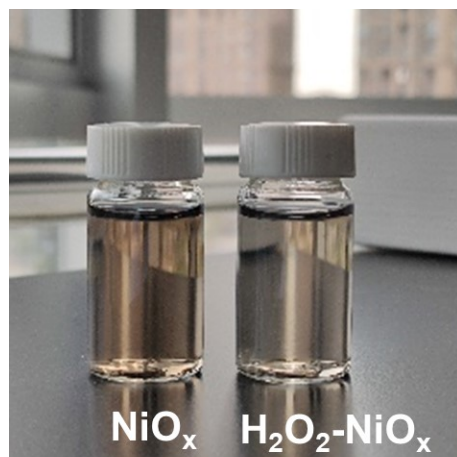

**Supplementary Fig. 1.** Photos of  $\text{NiO}_x$  aqueous solution (left) and  $\text{H}_2\text{O}_2\text{-NiO}_x$  aqueous solution (right) with  $2 \text{ mg mL}^{-1}$ .

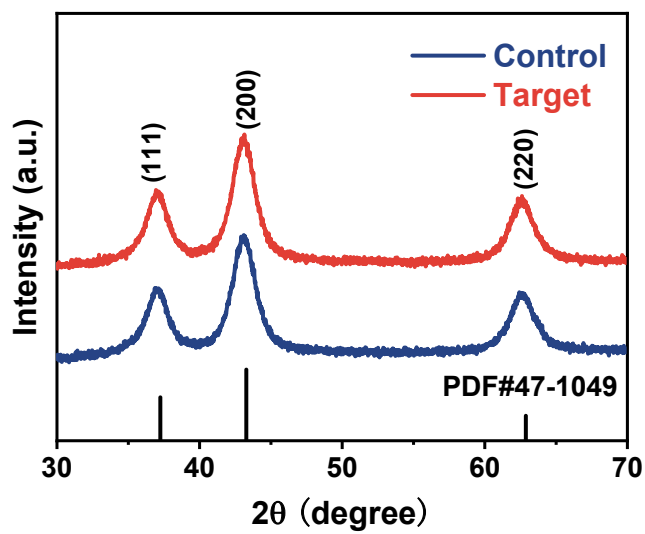

**Supplementary Fig. 2.** XRD patterns of the control and target  $\text{NiO}_x$  NCs powders.

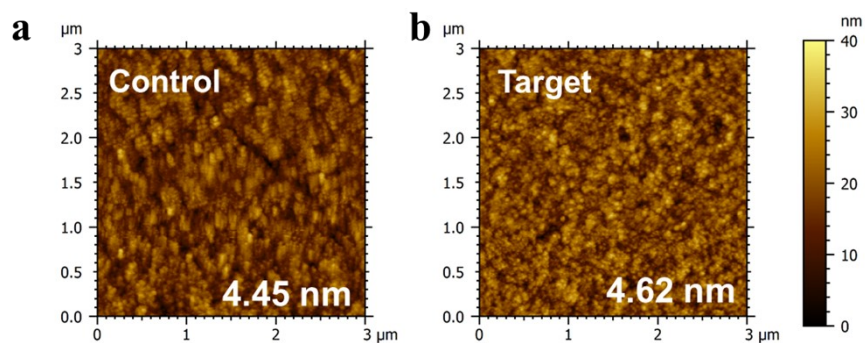

**Supplementary Fig. 3.** (a-b) AFM images of NiO<sub>x</sub> film from the control sample (a) and target sample (b). The numerical values in the bottom right of the figure represent the root mean square (RMS) roughness of the NiO<sub>x</sub> films. The RMS for the control sample is 4.62 nm, while the RMS for the target sample is 4.62 nm.

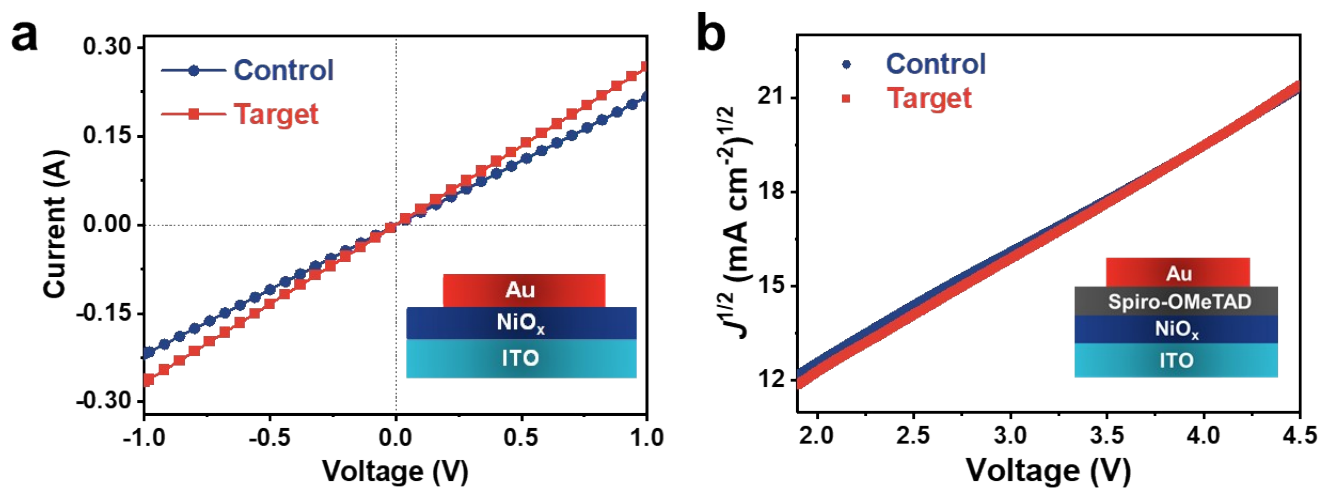

**Supplementary Fig. 4.** (a) The current-voltage (I-V) plots of the control and target NiO<sub>x</sub> films with a configuration of ITO/NiO<sub>x</sub>/Au. (b) Hole mobility of the control and target NiO<sub>x</sub> films with a configuration of ITO/NiO<sub>x</sub>/Spiro-OMeTAD/Au.

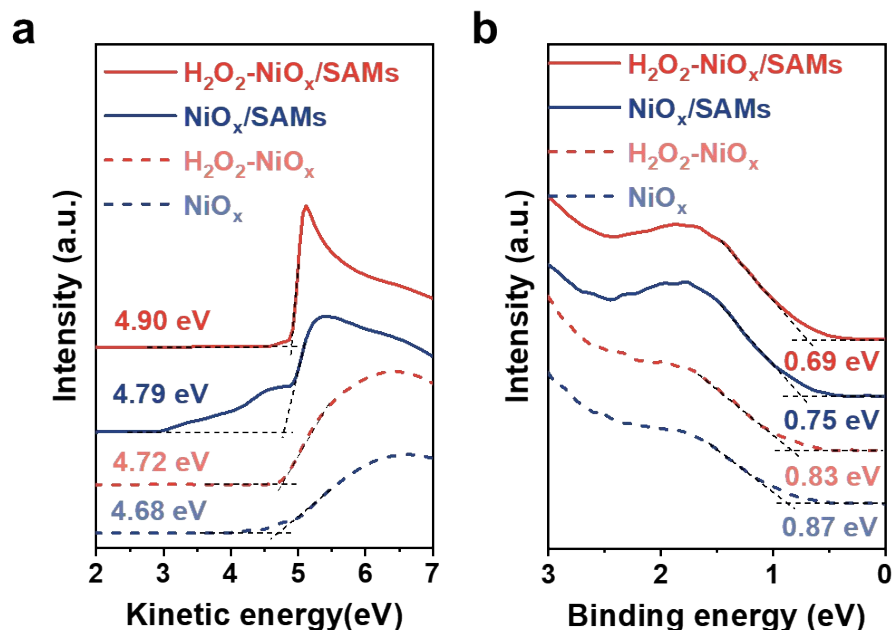

**Supplementary Fig. 5.** UPS spectra of ITO substrates covered by  $\text{NiO}_x$ ,  $\text{H}_2\text{O}_2\text{-NiO}_x$ ,  $\text{NiO}_x/\text{SAMs}$ ,  $\text{H}_2\text{O}_2\text{-NiO}_x/\text{SAMs}$ . (a) The secondary electron cut-off regions of UPS spectra. (b) Valence band onset regions of UPS spectra.

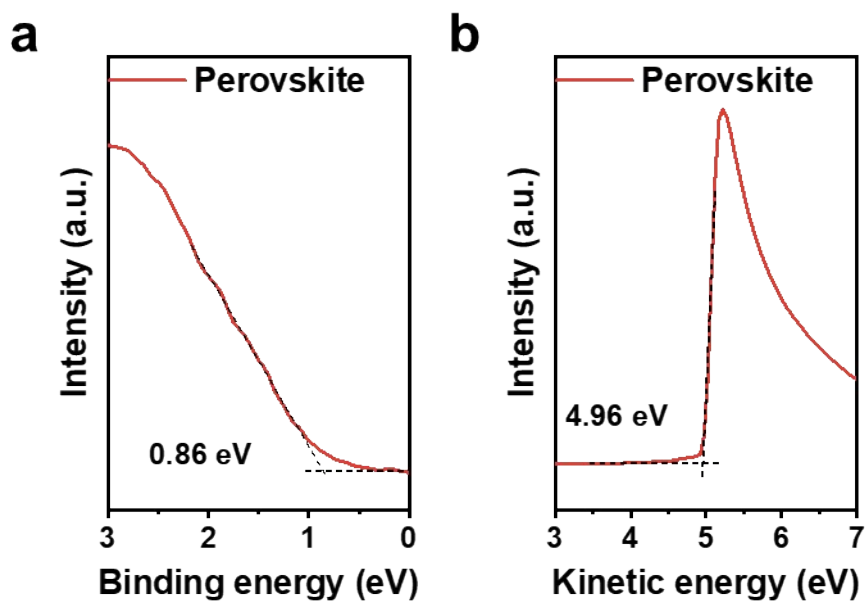

**Supplementary Fig. 6.** UPS spectra of perovskite film based on ITO substrate. (a) Valence band onset regions of UPS spectra. (b) The secondary electron cut-off regions of UPS spectra.

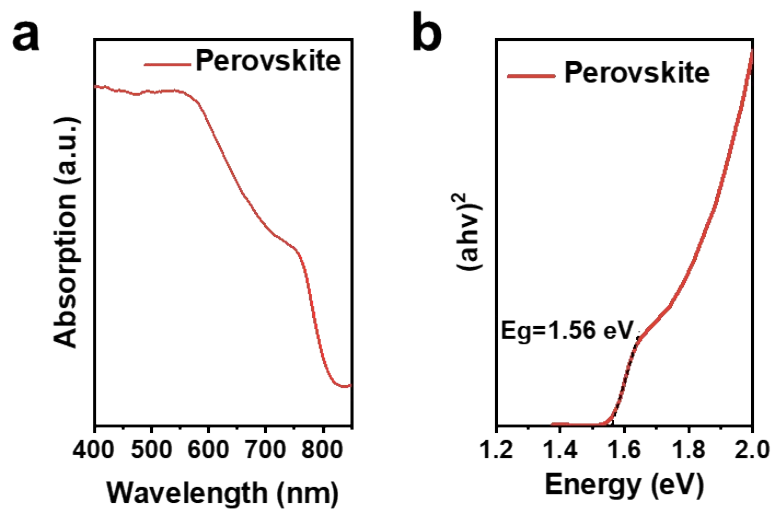

**Supplementary Fig. 7.** (a) The UV-vis absorption spectra of perovskite film. (b) Tauc plot of the perovskite film extracted from UV-vis absorption spectra.

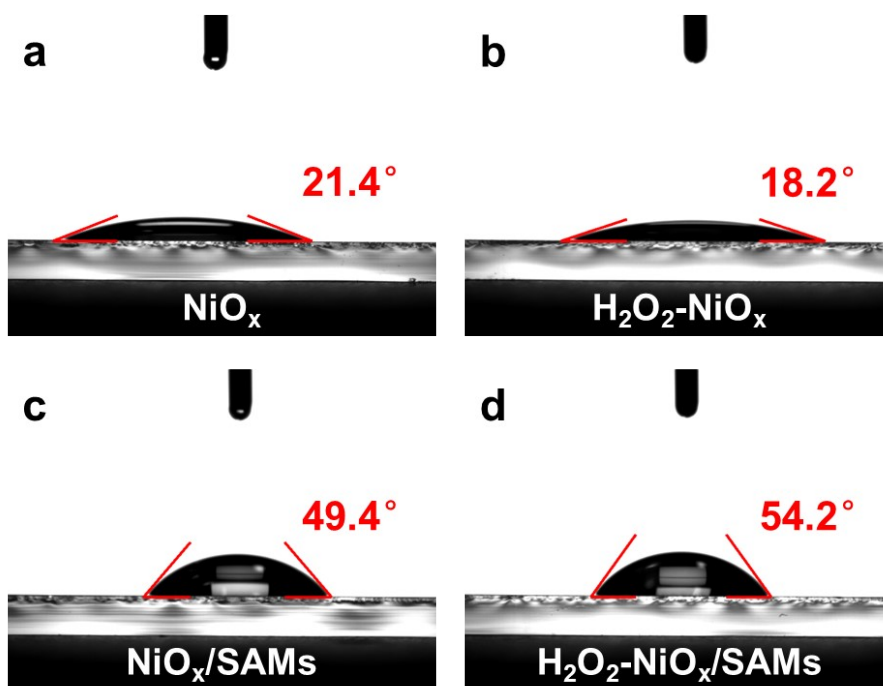

**Supplementary Fig. 8.** Contact angles of (a)  $\text{NiO}_x$ , (B)  $\text{H}_2\text{O}_2\text{-NiO}_x$ , (C)  $\text{NiO}_x/\text{SAMs}$  and (D)  $\text{H}_2\text{O}_2\text{-NiO}_x/\text{SAMs}$  with respect to water.

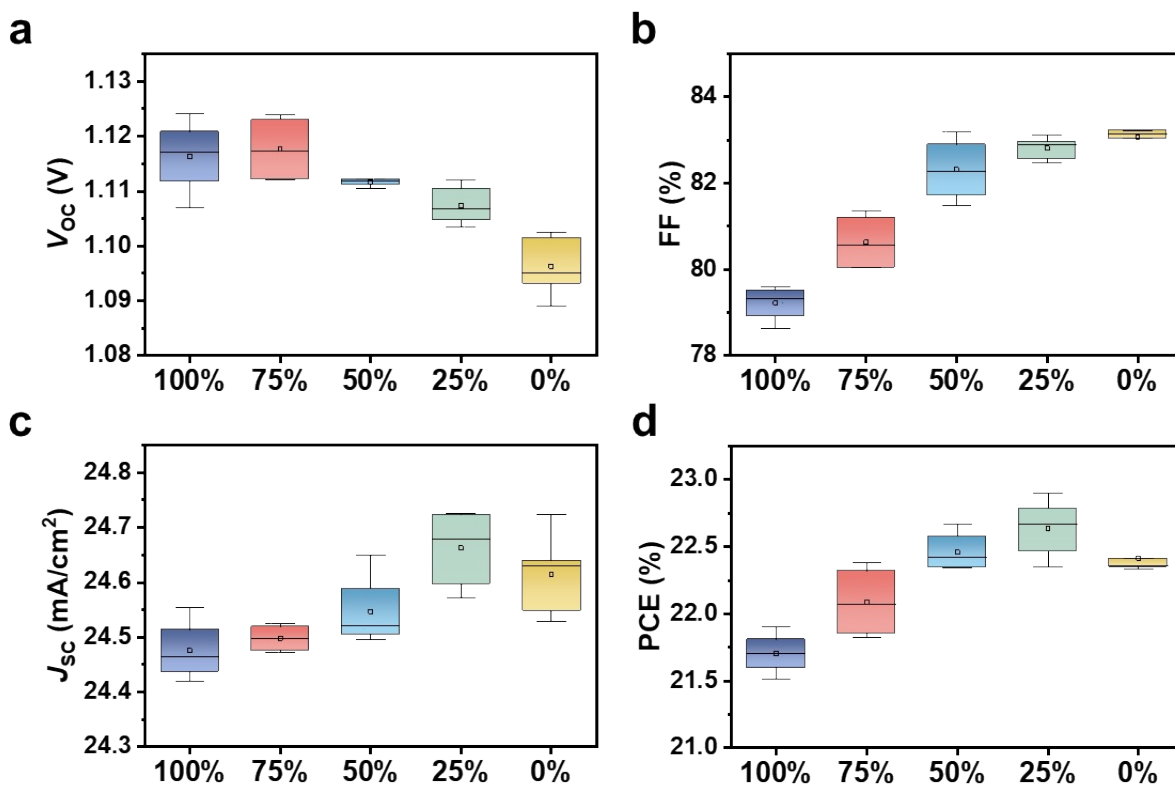

**Supplementary Fig. 9.** The statistics of performance parameters of p-i-n devices based on H<sub>2</sub>O<sub>2</sub>-NiO<sub>x</sub> substrate with various molar ratios of MeO-2PACz in mixed SAMs.

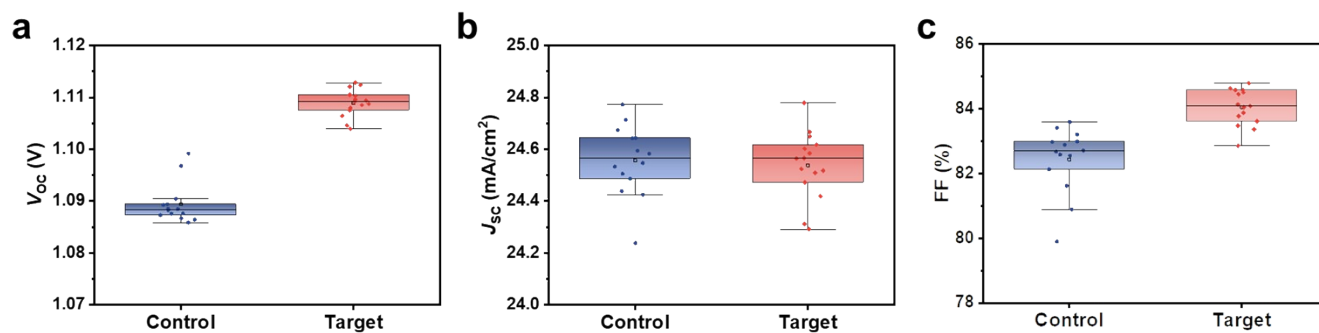

**Supplementary Fig. 10.** The statistics of performance parameters of p-i-n devices based on different HTLs. (a) Open-circuit voltage ( $V_{oc}$ ), (b) short circuit current density ( $J_{sc}$ ), (c) fill factor (FF).

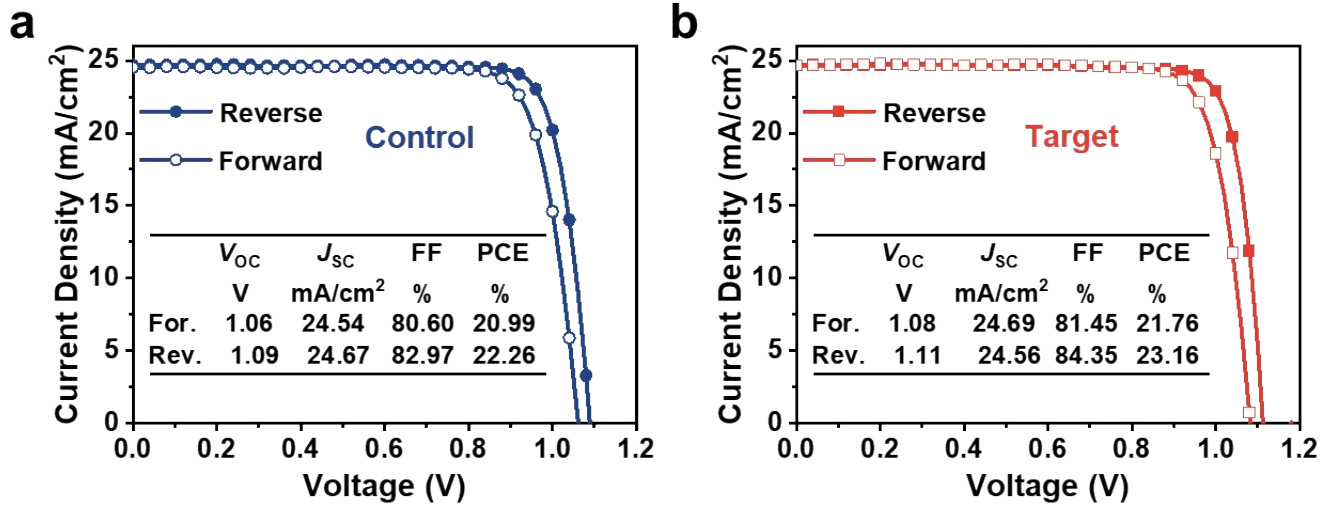

**Supplementary Fig. 11.** J-V curves of best-performing (a) control device and (b) target device obtained in forward and reverse scans with an aperture area of  $0.09 \text{ cm}^2$ .

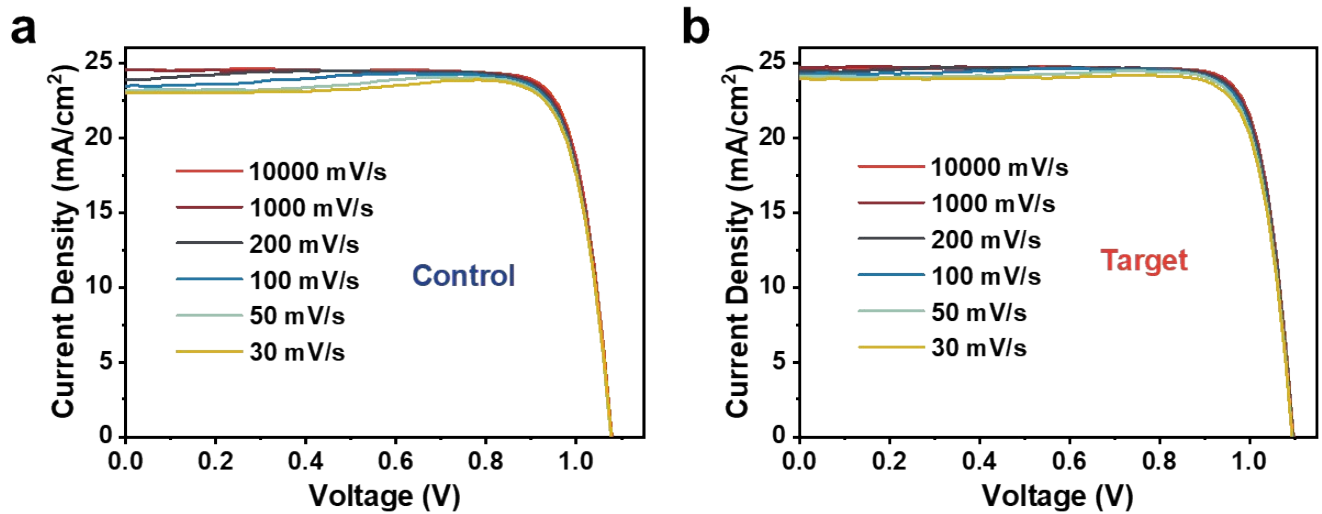

**Supplementary Fig. 12.** J-V curves of PSCs with different sweep rates from  $30$  to  $10000 \text{ mV s}^{-1}$  in reverse scans, with an aperture area of  $0.09 \text{ cm}^2$ .

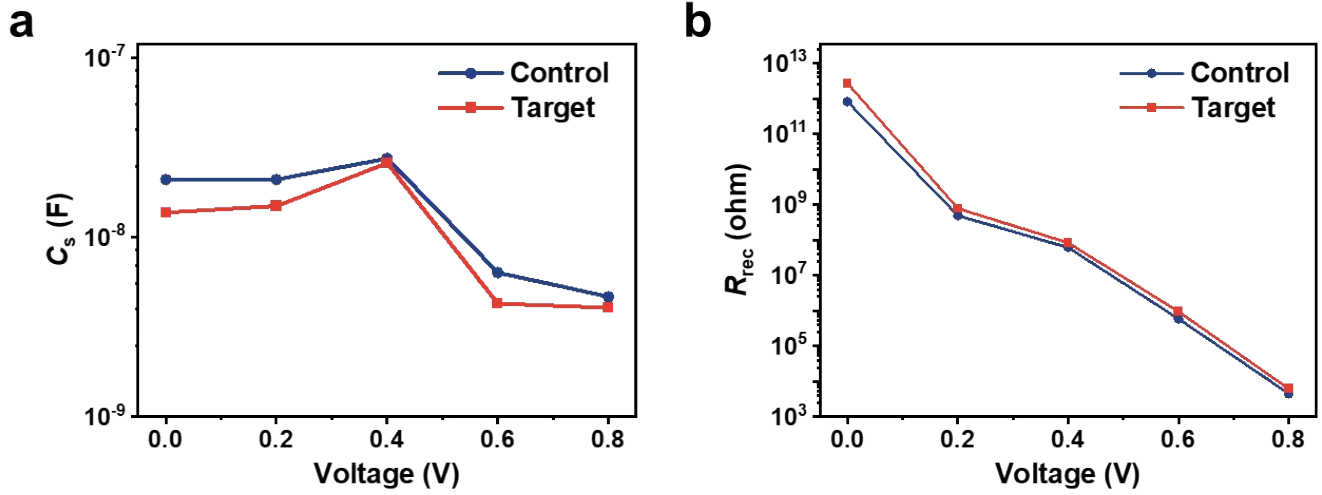

**Supplementary Fig. 13.** Electrochemical impedance spectroscopy (EIS) measurements of the control and target devices.  $C_s$  (a) and  $R_{rec}$  (b) as a function of the bias-voltage of PSCs.

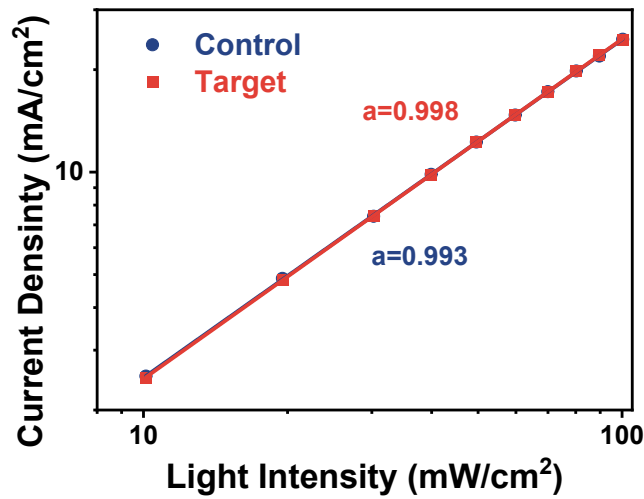

**Supplementary Fig. 14.** Dependence of  $J_{sc}$  versus the irradiation intensity for the control and target devices.



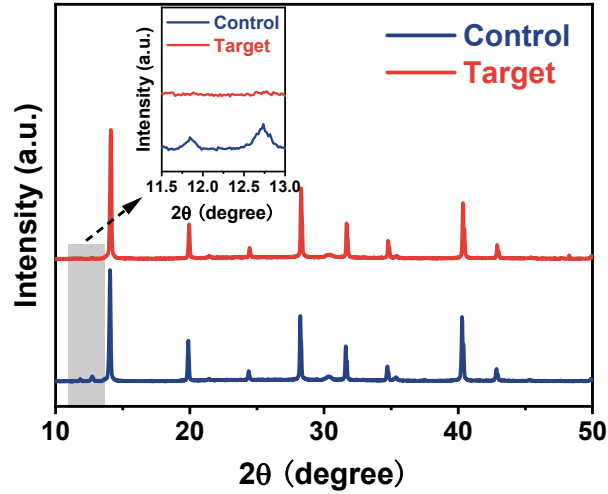

**Supplementary Fig. 15.** The XRD patterns of the perovskite film after 1500 h in a controlled chamber with 40% relative humidity. The grey area is the signal of perovskite degradation with the appearance of some  $\text{PbI}_2$  diffraction peaks.

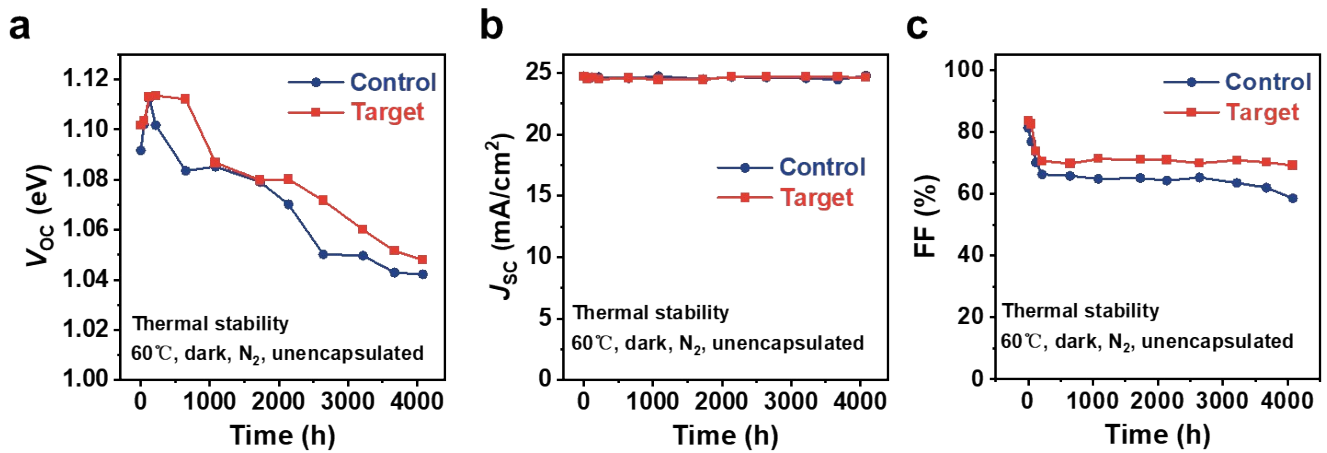

**Supplementary Fig. 16.** Distributions of  $V_{oc}$  (a),  $J_{sc}$  (b), FF (c) of control and target devices under continuously heating at 60°C in  $\text{N}_2$  atmosphere.

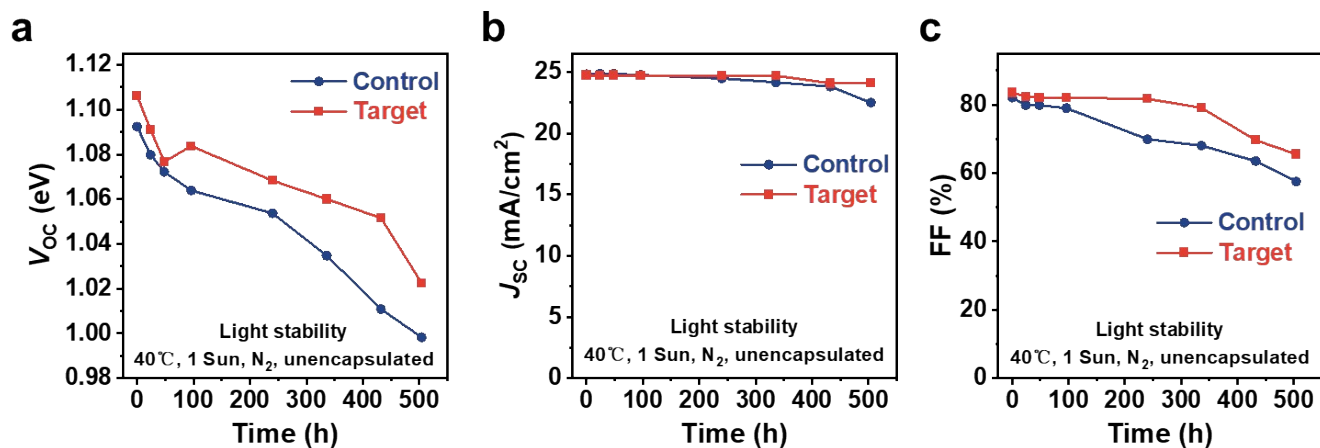

**Supplementary Fig. 17.** Distributions of  $V_{OC}$  (a),  $J_{SC}$  (b), FF (c) of control and target devices under under continuous one-sun illumination at  $40 \pm 5$  °C in  $N_2$  atmosphere.

| Composition | Control (Glass/ $NiO_x$ ) |          |           |        | Target (Glass/ $H_2O_2$ - $NiO_x$ ) |          |           |        |
|-------------|---------------------------|----------|-----------|--------|-------------------------------------|----------|-----------|--------|
|             | BE (eV)                   | Area     | FWHM (eV) | Ratios | BE (eV)                             | Area     | FWHM (eV) | Ratios |
| NiO         | 853.9                     | 40454.42 | 1.21      | 1.00   | 853.9                               | 34219.4  | 1.24      | 1.00   |
| $Ni_2O_3$   | 855.4                     | 55211.54 | 2.28      | 1.36   | 855.4                               | 50423.28 | 2.37      | 1.47   |
| NiOOH       | 856.5                     | 42969.90 | 3.03      | 1.06   | 856.5                               | 38485.00 | 3.31      | 1.12   |
| Satellite   | 860.9                     | 76960.77 | 3.63      | 1.90   | 861.0                               | 66916.73 | 3.61      | 1.96   |
| Satellite   | 864.0                     | 13770.92 | 2.47      | 0.34   | 864.0                               | 12704.15 | 2.61      | 0.37   |
| Satellite   | 866.4                     | 7504.51  | 2.24      | 0.19   | 866.6                               | 6025.23  | 2.26      | 0.18   |

**Supplementary Table 1** Peak fitting parameters of the Ni  $2p_{3/2}$  core level spectra.

**Supplementary Table 2** The fitting parameters of TRPL measurement of perovskite film based on NiO<sub>x</sub>/SAMs and H<sub>2</sub>O<sub>2</sub>-NiO<sub>x</sub>/SAMs substrate. The average decay time ( $\tau_{ave}$ ) were calculated according to the formula:  $\tau_{ave} = (A_1\tau_1^2 + A_2\tau_2^2)/(A_1\tau_1 + A_2\tau_2)$ .

|                                                   | $\tau_1$ (ns) | A <sub>1</sub> (%) | $\tau_2$ (ns) | A <sub>2</sub> (%) | $\tau_{ave}$ (ns) |
|---------------------------------------------------|---------------|--------------------|---------------|--------------------|-------------------|
| <b>ITO</b>                                        | 17.47         | 65.41              | 1372.07       | 442.78             | 1369.52           |
| <b>NiO<sub>x</sub></b>                            | 17.56         | 96.48              | 574.63        | 234.34             | 567.71            |
| <b>H<sub>2</sub>O<sub>2</sub>-NiO<sub>x</sub></b> | 12.73         | 111.46             | 396.78        | 209.10             | 390.33            |
